# Supplementary material for: Heterogeneous Co–Ni phosphide with active sites for water dissociation and efficient hydrogen evolution reaction
Source: Royal Society of Chemistry journal article supplement (doi:10.1039/d3dt03447j), 2023-12-21
Supplement: d3dt03447j1.pdf [file d3dt03447j1.pdf]

## Heterogeneous Co-Ni phosphide with active sites for water dissociation and efficient hydrogen evolution reaction

Nan Jiang<sup>\*a</sup>, Jiayou Li<sup>b</sup>, Bing Wang<sup>a</sup>, Yuhan Zhang<sup>b</sup>, Weijun Gao<sup>a,c</sup> and Bolong Jiang<sup>\*a, b</sup>

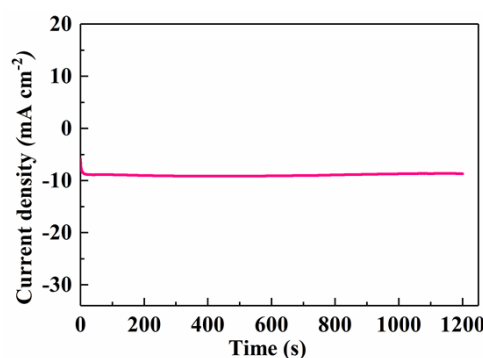

Figure S1. Chronopotentiometry curve for the preparation of  $\text{Co}_{0.5}\text{Ni}_{0.5}\text{-P}$  precursor

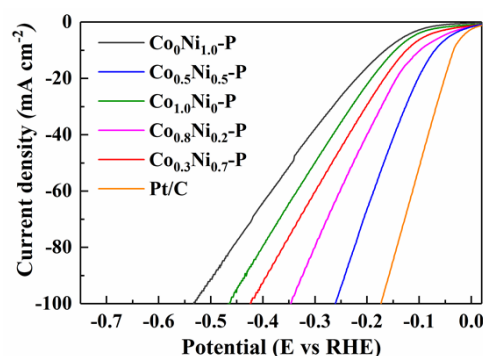

Figure S2. Polarization curves for  $\text{Co}_x\text{Ni}_{1-x}\text{-P}$  and Pt/C (without IR compensation)

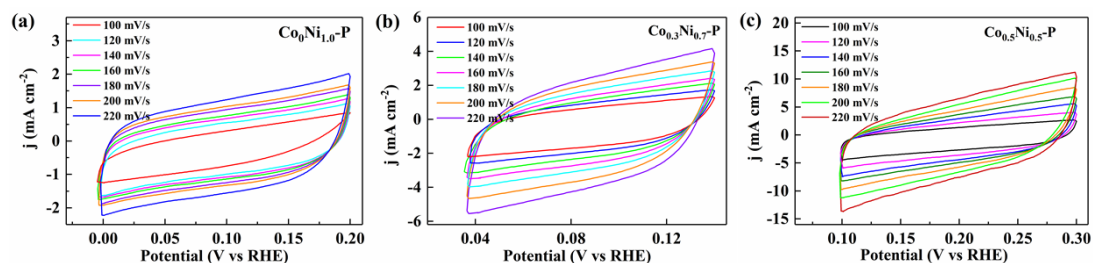

Innovation Institute for Sustainable Maritime Architecture Research and Technology, Qingdao University of Technology, Qingdao 266033, PR China. Email addresses: jiangnan@qut.edu.cn

School of Environmental and municipal Engineering, Qingdao University of Technology, Qingdao 266033, PR China.

Faculty of Environmental Engineering, the University of Kitakyushu, Kitakyushu 808-0135, Japan.

†Electronic Supplementary Information (ESI) available: [details of any supplementary information available should be included here]. See DOI: 10.1039/x0xx00000x

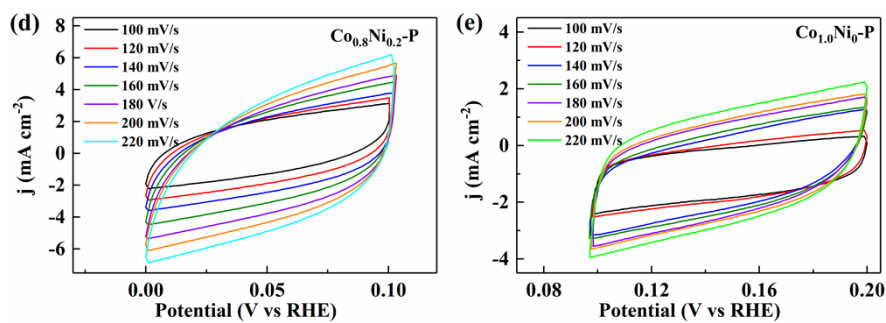

Figure S3. CV curves of (a)  $\text{Co}_0\text{Ni}_{1.0}\text{-P}$ , (b)  $\text{Co}_{0.3}\text{Ni}_{0.7}\text{-P}$ , (c)  $\text{Co}_{0.5}\text{Ni}_{0.5}\text{-P}$ , (d)  $\text{Co}_{0.8}\text{Ni}_{0.2}\text{-P}$  and (e)  $\text{Co}_{1.0}\text{Ni}_0\text{-P}$  in non-faradaic regions .

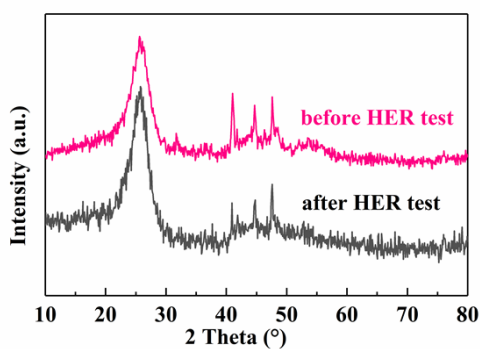

Figure S4. The XRD pattern of  $\text{Co}_{0.5}\text{Ni}_{0.5}\text{-P}$  before and after long-term HER measurement.

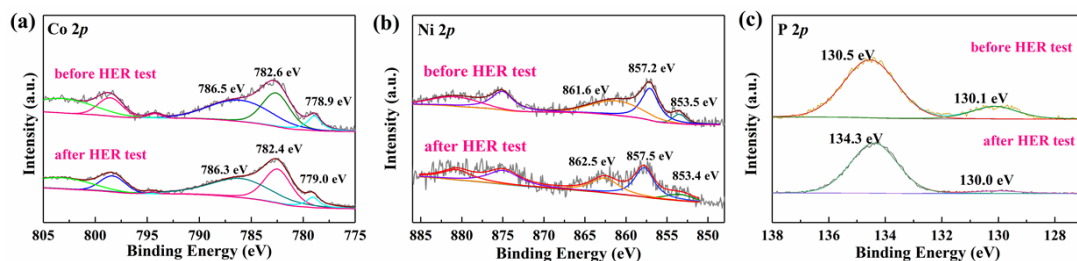

Figure S5. (a) The Co 2p, (b) Ni 2p and (c) P 2p of  $\text{Co}_{0.5}\text{Ni}_{0.5}\text{-P}$  before and after long-term HER measurement.
